# Supplementary material for: Biodeterioration of Microplastics by Bacteria Isolated from Mangrove Sediment
Source: MDPI journal article supplement (doi:10.3390/toxics11050432), 2023-05-05
Supplement: s1 [file s1]

**Supplementary Materials for:**

**Biodeterioration of microplastics by bacteria isolated from mangrove  
sediment**

Shu-Yan Ren and Hong-Gang Ni \*

School of Urban Planning and Design, Peking University Shenzhen Graduate  
School, Shenzhen 518055, China.

**Corresponding Author:**

Phone: +86-755-26033017. Fax: +86-755-26033254. E-mail: nihg@pkusz.edu.cn

Table S1 Degradation and screening microorganisms of different microplastics.

| This study |      |         |                             |                             |                                                              | Other studies               |                             |                            | References |
|------------|------|---------|-----------------------------|-----------------------------|--------------------------------------------------------------|-----------------------------|-----------------------------|----------------------------|------------|
| Type       | OD   | Biomass | Duration of degradation (d) | Gravimetric weight loss (%) | Major degrading bacteria                                     | Duration of degradation (d) | Gravimetric weight loss (%) | Major degrading bacteria   |            |
| PVC        | 0.13 | 587.9   | 30                          | 8.9                         | <i>Burkholderia-Caballeronia-Paraburkholderia, Pandoraea</i> | 28                          | 9.00                        | <i>Chaetomium globosum</i> | [48]       |
|            |      |         |                             |                             |                                                              | 90                          | 0.26                        | <i>Bacillus sp. AIIW2</i>  | [65]       |

|    |      |       |    |     |                          |    |      |                            |      |
|----|------|-------|----|-----|--------------------------|----|------|----------------------------|------|
| PS | 0.21 | 386.1 | 30 | 9.2 | <i>Hyphomicrobium,</i>   | 30 | 12.4 | /                          | [26] |
|    |      |       |    |     | <i>f_Xanthobacterace</i> |    |      |                            |      |
|    |      |       |    |     | <i>ae_Unclassified,</i>  |    |      |                            |      |
|    |      |       |    |     | <i>Pandoraea,</i>        |    |      |                            |      |
|    |      |       |    |     | <i>f_Xanthobacterace</i> |    |      |                            |      |
|    |      |       |    |     | <i>ae_Unclassified</i>   |    |      |                            |      |
|    |      |       |    |     |                          | 30 | 40.2 | <i>Pseudozyma japonica</i> | [42] |
|    |      |       |    |     |                          |    |      | Y7-09                      |      |
|    |      |       |    |     |                          | 56 | 0.80 | <i>Rhodococcus ruber</i>   | [66] |
|    |      |       |    |     |                          |    |      | C208                       |      |
| PP | 0.82 | 87.63 | 30 | 13  | <i>Burkholderia-</i>     | 40 | 18.4 | <i>Stenotrophomonas</i>    | [49] |
|    |      |       |    |     | <i>Caballeronia-</i>     |    |      | <i>panacihumi</i>          |      |
|    |      |       |    |     | <i>Paraburkholderia,</i> |    |      | PA3-2                      |      |

|     |      |       |    |    |                          |     |      |                              |         |
|-----|------|-------|----|----|--------------------------|-----|------|------------------------------|---------|
|     |      |       |    |    | <i>Pandoraea</i>         | 40  | 6.40 | <i>Rhodococcus sp.</i>       | 36 [27] |
|     |      |       |    |    | <i>f_Xanthobacterace</i> | 357 | 6.70 | <i>Methylobacter sp. and</i> | [67]    |
|     |      |       |    |    | <i>ae_Unclassified</i>   |     |      | <i>Methylocella sp.</i>      |         |
| PVA | 0.47 | 158.7 | 30 | 12 | <i>Pseudomonas,</i>      | 12  | 100  | <i>Penicillium sp.</i>       | [45]    |
|     |      |       |    |    | <i>Burkholderia-</i>     |     |      | WAH02-21                     |         |
|     |      |       |    |    | <i>Caballeronia-</i>     |     |      |                              |         |
|     |      |       |    |    | <i>Paraburkholderia,</i> |     |      |                              |         |
|     |      |       |    |    | <i>Pandoraea</i>         |     |      |                              |         |
|     |      |       |    |    |                          | 46  | 75.0 | <i>cardiobacterium</i>       | [45]    |
|     |      |       |    |    |                          |     |      | <i>sp.SB68</i>               |         |
| PA  | 0.68 | 133.6 | 30 | 12 | <i>Novosphingobium</i>   | 30  | /    | <i>Escherichia coli</i>      | [68]    |
|     |      |       |    |    | ,                        |     |      |                              |         |
|     |      |       |    |    | <i>f_Rhizobiaceae_U</i>  |     |      |                              |         |

|     |      |       |    |    |                          |     |      |                            |      |
|-----|------|-------|----|----|--------------------------|-----|------|----------------------------|------|
|     |      |       |    |    | <i>nclassified,</i>      |     |      |                            |      |
|     |      |       |    |    | <i>Achromobacter</i>     |     |      |                            |      |
|     |      |       |    |    |                          | 90  | 7.00 | <i>Bacillus cereus,</i>    | [69] |
|     |      |       |    |    |                          |     |      | <i>Bacillus sphericus,</i> |      |
| PHB | 0.35 | 241.8 | 30 | 13 | <i>f_Xanthobacterace</i> | 52h | 100  | <i>Pseudomonas</i>         | [43] |
|     |      |       |    |    | <i>ae_Unclassified,</i>  |     |      | <i>mendocina DS04-T</i>    |      |
|     |      |       |    |    | <i>Dyella,</i>           |     |      |                            |      |
|     |      |       |    |    | <i>Pandoraea</i>         |     |      |                            |      |
|     |      |       |    |    |                          | 7   | 92.0 | <i>Aspergillus 39</i>      | [70] |
|     |      |       |    |    |                          | 63  | 32.0 | <i>Vibrio furnisii and</i> | [71] |
|     |      |       |    |    |                          |     |      | <i>Brevundimonas</i>       |      |
|     |      |       |    |    |                          |     |      | <i>vesicularis</i>         |      |

|     |      |       |    |     |                          |    |      |                             |      |
|-----|------|-------|----|-----|--------------------------|----|------|-----------------------------|------|
| PCL | 0.24 | 372.2 | 30 | 9.7 | <i>Pandoraea,</i>        | 7  | 100  | <i>Micorbispora rosea</i>   | [44] |
|     |      |       |    |     | <i>f_Xanthobacterace</i> |    |      | <i>subsp. Taiwanensis</i>   |      |
|     |      |       |    |     | <i>ae_Unclassified</i>   |    |      | <i>HS 45-1</i>              |      |
|     |      |       |    |     |                          | 10 | 10.0 | <i>Paecilomyces</i>         | [72] |
|     |      |       |    |     |                          |    |      | <i>lilacinus D218</i>       |      |
|     |      |       |    |     |                          | 30 | 9.00 | <i>Lysinibacillus sp.</i>   | [73] |
|     |      |       |    |     |                          |    |      | <i>70038</i>                |      |
| PBS | 0.40 | 190.5 | 30 | 12  | <i>Pandoraea, Dyella</i> | 14 | 90.2 | <i>Bacillus pumilus 1-A</i> | [46] |
|     |      |       |    |     |                          | 14 | 2.80 | <i>Fusarium solani WF-</i>  | [74] |
|     |      |       |    |     |                          |    |      | <i>6</i>                    |      |
| PLA | 0.26 | 299.5 | 30 | 12  | <i>Dyella,</i>           |    |      |                             |      |
|     |      |       |    |     | <i>Allorhizobium-</i>    |    |      |                             |      |
|     |      |       |    |     | <i>Neorhizobium-</i>     |    |      |                             |      |

*Pararhizobium-*

*Rhizobium,*

*Pandoraea*

5                      29.4                      *Pseudomonas*                      [75]

*mendocina*

15                      26.9                      *Cladosporium*                      [76]

*sphaerospermum,*

*Rhodotorula*

*mucilaginosa,*

*Penicillium*

*chrysogenum and*

*Serratia marcescens*

|    |      |       |    |    |                                                                    |    |           |                                                     |      |
|----|------|-------|----|----|--------------------------------------------------------------------|----|-----------|-----------------------------------------------------|------|
|    |      |       |    |    |                                                                    | 20 | 25.0      | <i>Geobacillus thermocatenulatus</i>                | [77] |
|    |      |       |    |    |                                                                    | 40 | 40.0      | <i>Bacillus licheniformis</i>                       | [78] |
| PE | 0.12 | 699.8 | 30 | 13 | <i>Acidovorax,</i><br><i>Bdellovibrio,</i><br><i>Acinetobacter</i> | 28 | 5.80-10.9 | <i>Enterobacter asburiae,</i><br><i>Bacillus</i>    | [27] |
|    |      |       |    |    |                                                                    | 30 | 15.2      | <i>Pseudomonas sp.</i><br><i>GMB7</i>               | [79] |
|    |      |       |    |    |                                                                    | 60 | 87.5      | <i>Bacillus cereus</i><br><i>VASB1/TS</i>           | [47] |
|    |      |       |    |    |                                                                    | 60 | 14.7      | <i>Bacillus sp. And</i><br><i>Paenibacillus sp.</i> | [80] |



|     |      |       |    |    |                          |      |                      |      |
|-----|------|-------|----|----|--------------------------|------|----------------------|------|
|     |      |       |    |    | 150                      | 6.10 | <i>Achromobacter</i> | [81] |
|     |      |       |    |    |                          |      | <i>xylooxidans</i>   |      |
| PHA | 0.81 | 89.63 | 30 | 13 | <i>Burkholderia-</i>     |      |                      |      |
|     |      |       |    |    | <i>Caballeronia-</i>     |      |                      |      |
|     |      |       |    |    | <i>Paraburkholderia,</i> |      |                      |      |
|     |      |       |    |    | <i>Klebsiella</i>        |      |                      |      |

---
